# Supplementary material for: Evolution of biological sequences implies an extreme value distribution of type I for both global and local pairwise alignment scores
Source: Springer Nature journal article supplement (doi:10.1186/1471-2105-9-332), 2008-08-07

**A. Valine**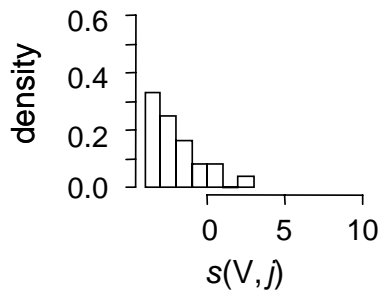**B. Threonine**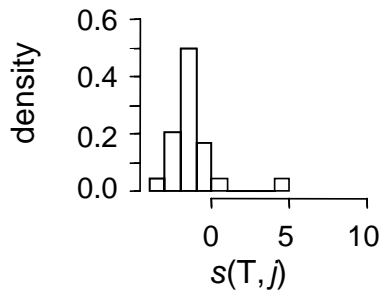**C. All residues (based on BLOSUM 62)**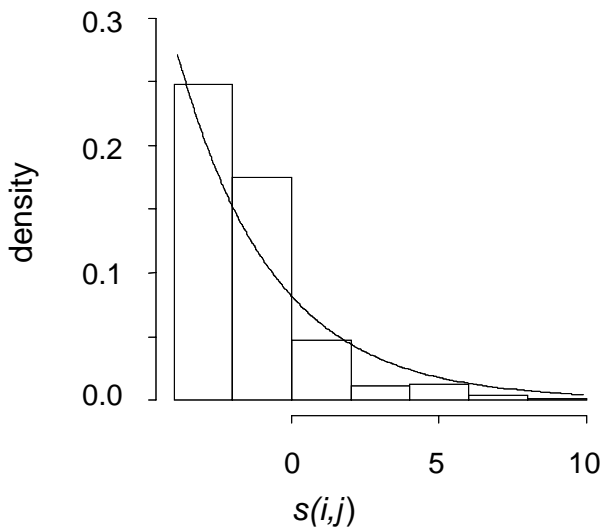

Supplement: 12859_2007_2317_MOESM1_ESM.pdf [file 12859_2007_2317_MOESM1_ESM.pdf]
