# Supplementary material for: Evolution of biological sequences implies an extreme value distribution of type I for both global and local pairwise alignment scores
Source: Springer Nature journal article supplement (doi:10.1186/1471-2105-9-332), 2008-08-07

**Step 1**, evolution of one residue:  $a_1 \rightarrow b_1$

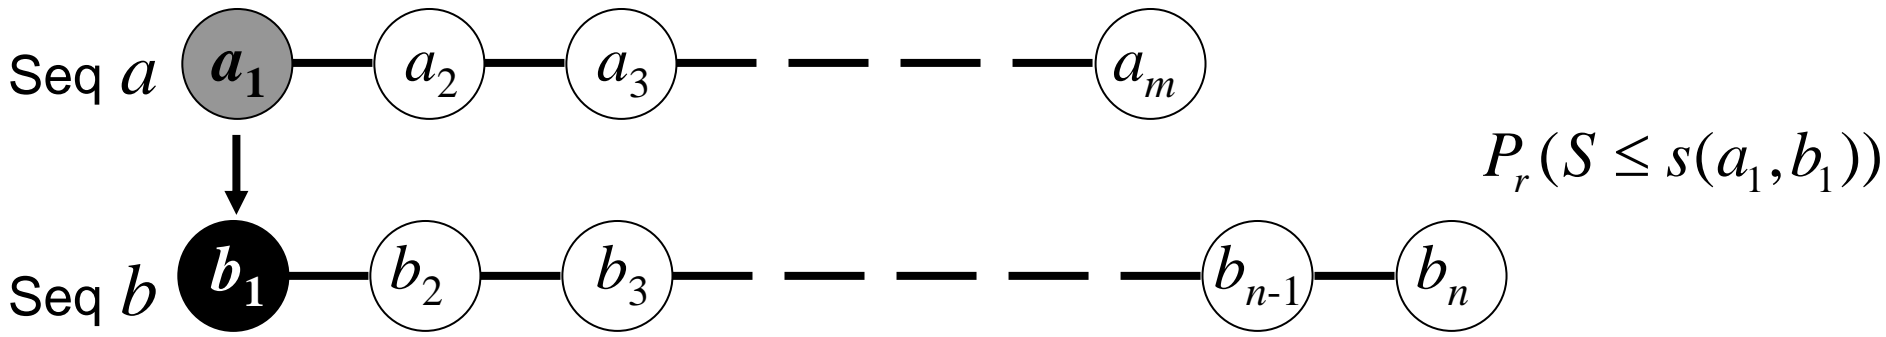

**Step 2**, one evolutionary scenario given by one alignment

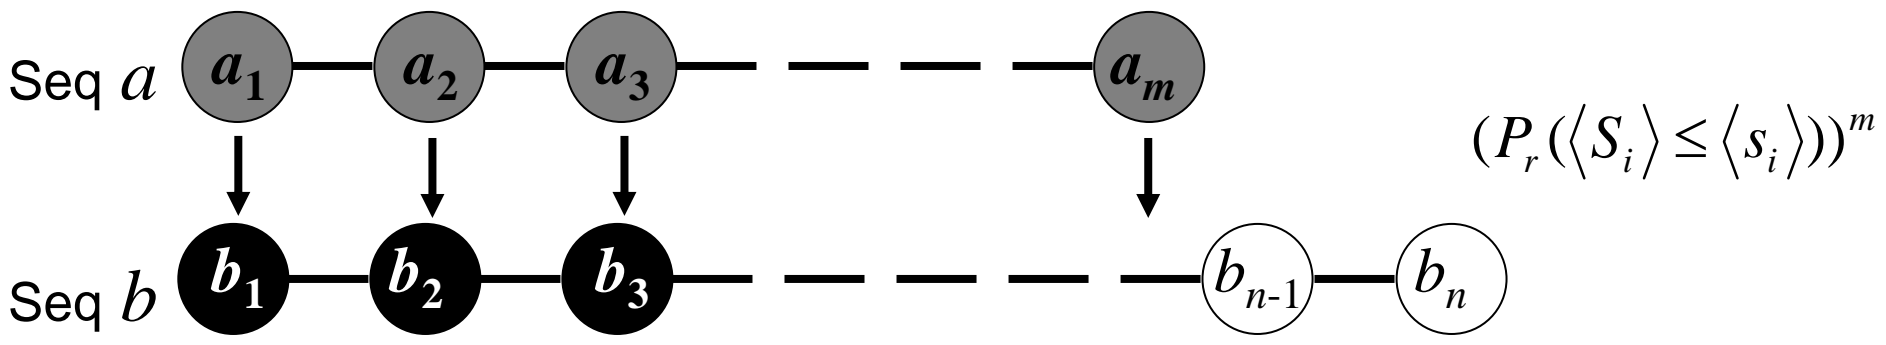

**Step 3**, taking into account alternative alignments

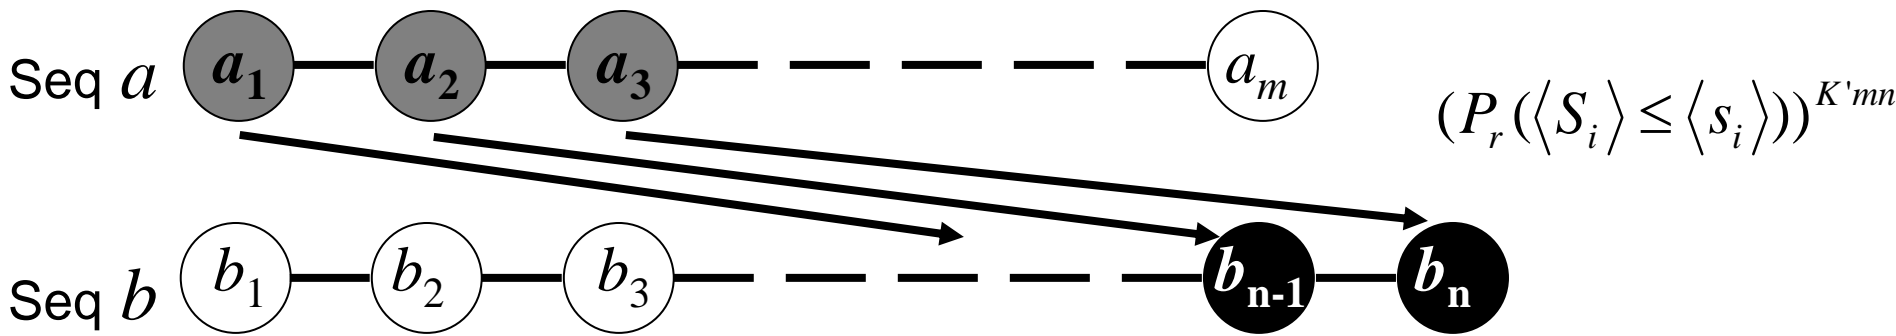

Supplement: 12859_2007_2317_MOESM2_ESM.pdf [file 12859_2007_2317_MOESM2_ESM.pdf]
